# Supplementary material for: Investigation of vanadia–alumina catalysts with solid-state NMR spectroscopy and DFT
Source: Royal Society of Chemistry journal article supplement (doi:10.1039/d1cp03297f), 2021-01-01
Supplement: d1cp03297f1.pdf [file d1cp03297f1.pdf]

## Supporting Information

# Investigation of vanadia-alumina catalysts with solid-state NMR spectroscopy and DFT

Evgeniy Papulovskiy,<sup>\*a</sup> Aleksandr A. Shubin,<sup>ab</sup> and Olga B. Lapina<sup>a</sup>

<sup>a</sup> Borekov Institute of Catalysis, 630090 Novosibirsk, Russia.

<sup>b</sup> Novosibirsk State University, 630090 Novosibirsk, Russia

\* e-mail: fyr@catalysis.ru

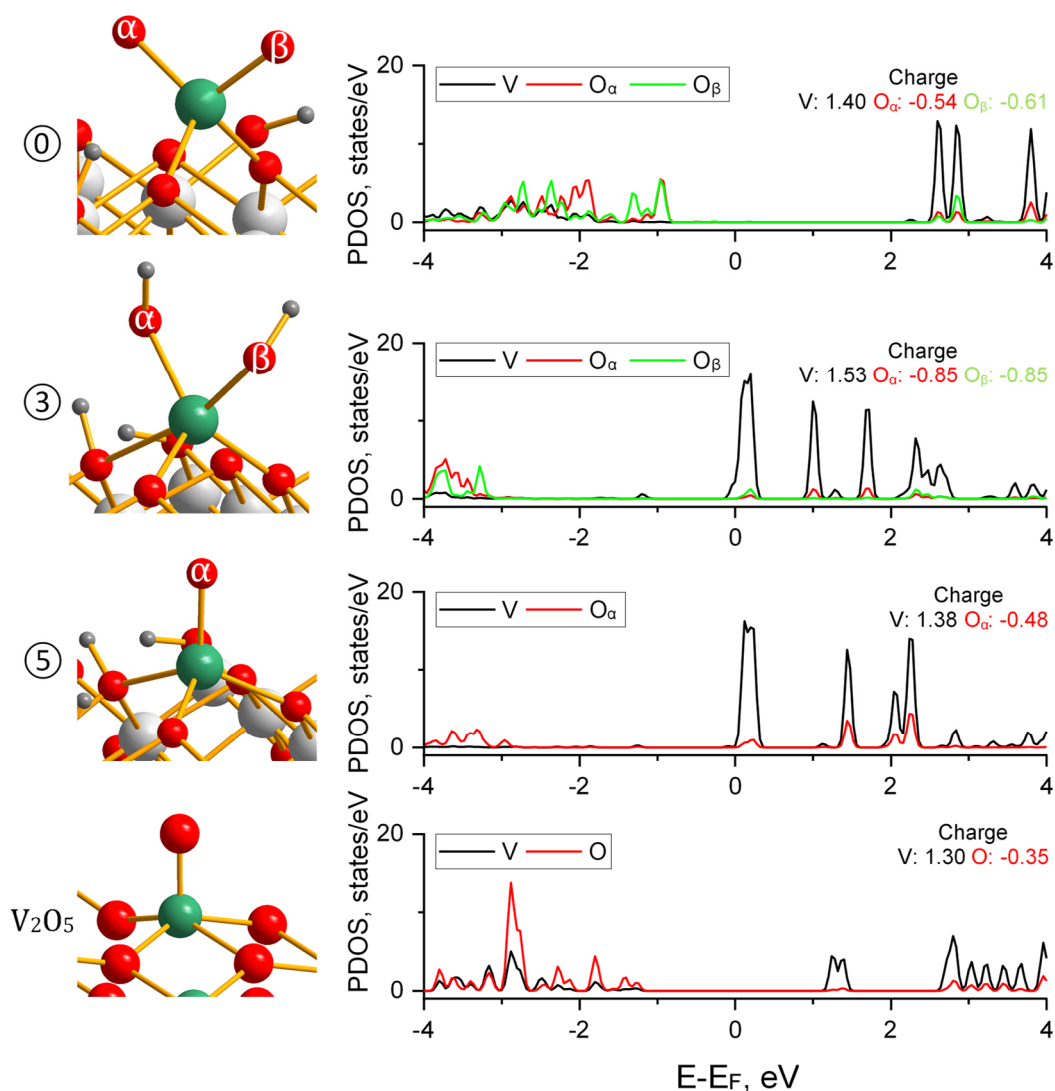

Figure S1. PDOS for the states of the site under investigation. The numbers to the left are referred to the reaction path,  $V_2O_5$  is computed at the same level of theory to be used as a reference. Mulliken charges are also shown.
